# Supplementary material for: New record in optical gain and room-temperature nanolasers in multiple wavelengths in 2D ErOCl single crystals
Source: Research Square preprint supplement (doi:10.21203/rs.3.rs-8254857/v1), 2026-01-28
Supplement: Supplementary file 1 [file 2f9e0f644ff771e9c4507971.docx]

**Supplementary Information for**

**New record in optical gain and room-temperature nanolasers**

**in multiple wavelengths in 2D ErOCl single crystals**

Shipeng Yao1, 2, 3, †, Hao Sun1, 3, †, *, Zhang Liang2, Zhen Wang2, Lin Gan1, 3, Jinhua Wu1, 2, 3,

Zhangyu Hou1, 2, 3, Cun-Zheng Ning1, 2, 3, *

1Department of Electronic Engineering, Tsinghua University, Beijing 100084, China

2College of Integrated Circuits and Optoelectronic Chips, Shenzhen Technology University, Shenzhen, Guangdong 518118, China

3International Center for Nano-Optoelectronics, Tsinghua University, Beijing 100084, China

†These authors contributed equally to this work

[*haosun@mail.tsinghua.edu.cn](mailto:*haosun@mail.tsinghua.edu.cn); [ningcunzheng@sztu.edu.cn](mailto:ningcunzheng@sztu.edu.cn)

**List of Contents**

Section 1. Growth and Optimization of Single-crystal ErOCl on Silicon Substrates

Section 2. Absorption and Optical Gain Characterization of ErOCl

Section 3. Design and Fabrication of Photonic Crystal Microcavities

Section 4. Linewidth Analysis of Lasing Modes

Section 5. Spatial Light Distribution Imaging: Below- and Above-Threshold

Section 6. Lifetime Dynamics of Spontaneous Emission vs. Lasing Emission

Section 7. Four-level Rate Equation Modeling for Er3+ Ion Population Dynamics

Section 8. Performance Benchmarking and Operational Stability Assessment

**Section 1. Growth and Optimization of Single-crystal ErOCl on Silicon Substrates**

**1.1 NaCl-catalyzed Growth of ErOCl on Silicon**

We successfully synthesized high-quality single-crystalline ErOCl nanosheets through a sodium chloride (NaCl) -catalyzed chemical vapor deposition (CVD) process at 900 °C under 95% Ar/5% H₂ atmosphere, utilizing erbium trichloride (ErCl3) as the precursor. Conventional CVD growth of ErOCl on silicon substrates typically produces irregular morphologies due to its intrinsically high lattice formation energy. Crucially, the introduction of NaCl restructures the growth thermodynamics and kinetics through a dual catalytic mechanism.

Figure S1 (a) Morphology of ErOCl nanosheets without NaCl catalysis. (b) Morphology of ErOCl nanosheets catalyzed by NaCl, with the mass ratio of ErCl3 to NaCl is 8:1. (c) Atomic force microscopy (AFM) characterization of as-grown ErOCl. The layer thickness is measured to be 0.9 nm.

First, analogous to the synthesis of transition-metal dichalcogenides (TMDCs), NaCl generated transient Na-Er-O-Cl molten droplets during the CVD process. These droplets acted as catalytic nucleation sites, reducing the nucleation energy barriers and accelerating lateral growth rates1. Figure S1a, b demonstrates this catalytic efficacy, where uncatalyzed growth exhibits poor growth status, whereas NaCl-assisted synthesis produces uniform hexagonal nanosheets under identical growth conditions. Second, NaCl decomposition elevated the chlorine partial pressure, shifting the Er-O-Cl reaction equilibrium toward ErOCl formation. Concurrently, the molten droplets dynamically optimized interfacial stoichiometry, enabling epitaxial step-edge propagation. AFM thickness measurements in Fig. S1c reveal monolayer hexagonal-shaped ErOCl nanosheets with minimum step heights of ~ 0.9 nm, consistent with the interlayer spacing observed in high-resolution transmission electron microscopy (HRTEM) lattice profiles in Fig. 1e in the main text. Structural characterization revealed single-crystal quality of the as-grown ErOCl nanosheets, as evidenced by high-resolution TEM imaging showing atomically ordered lattices (Fig. 1d, f in the main text) and XRD (Fig. 1b) patterns exhibiting sharp peaks. These results establish NaCl catalysis as an effective strategy for overcoming intrinsic thermodynamic limitations in the synthesis of rare-earth oxychlorides.

**1.2** Nucleation Dynamics and Growth Morphology of ErOCl Crystals

Systematic investigation of NaCl concentration and growth duration elucidated two competing nucleation pathways governing ErOCl morphology evolution. Under NaCl-deficient conditions, edge-initiated epitaxy dominates: primary ErOCl nanowires nucleate along the ⟨110⟩ direction of Si (111) substrates, followed by epitaxy growth perpendicular to the wire axis (Fig. S2a, b). As growth continues, additional layers nucleate, resulting in a vertically stacked multilayer structure (Fig. S2c, d). Increasing NaCl vapor pressure triggers a phase transition to liquid-mediated centrosymmetric nucleation. First, Na-Cl-Er-O droplets form on the substrate (Fig. S2d), serving as catalytic templates with reduced activation energy. Subsequent vapor-solid epitaxial growth propagates radially from these droplets (Fig. S2f), generating hexagonal nanosheets with in-plane crystalline coherence. As the synthesis progresses, NaCl evaporates due to elevated temperatures, yielding high-quality vertically stacked ErOCl nanostructures (Fig. S2g, h).

Figure S2 Illustration of grow mechanisms: edge nucleation and central nucleation.

Figure S3 presents a comparative analysis of ErOCl growth dynamics under edge-initiated and catalytic-mediated central nucleation pathways. Figure S3a-c capture sequential stages of edge nucleation in NaCl-free conditions, where initial nanowire forms along the Si (110) direction (Fig. S3b), ultimately yielding incomplete hexagonal morphologies due to kinetic limitations (Fig. S3c). In contrast, NaCl-catalyzed central nucleation enables favored radial expansion at a higher rate, reducing the activation energy barrier and promoting the formation of regular hexagonal nanosheets (Fig. S3d).

Figure S3 Growth dynamics and morphological evolution of ErOCl crystals: (a)-(c) Edge nucleation in the absence of NaCl catalysis. (d) Edge nucleation and growth under NaCl catalysis. (e)-(h) Central nucleation and time-dependent morphological evolution (10/15/20/60 minutes). (i)-(j) SEM image and EDS compositional analysis of the nucleation center (O, Cl, Er, Na); (k) SEM image of ErOCl nanosheets with central defect following NaCl evaporation; (l) SEM image of defect-free ErOCl nanosheets.

Figure S3e-h capture sequential stages of central nucleation in NaCl-catalytic conditions. The central nucleation mechanism initiates with the deposition of molten Na-Cl-Er-O droplets on the substrate (Fig. S3e), serving as catalytic nucleation centers (SEM in Fig. S3i and the corresponding composition from Energy Dispersive Spectrometry (EDS) in Fig. S3j). These droplets enable rapid radial epitaxial growth (Fig. S3f), producing regular hexagonal structures (Fig. S3g, h). As growth progresses, the transient liquid mixture evaporates, generating characteristic pores (1-2 μm in diameter, Fig. S3k) that self-heal during prolonged growth to form defect-free hexagonal nanosheets with regular shapes (Fig. S3l). This tunable pathway manipulation establishes NaCl as a versatile morphological director in rare-earth oxychloride synthesis, reconciling high crystallinity with structural control.

**Section 2. Absorption and Optical Gain Characterization of ErOCl**

**2.1 Characterization of Absorption Coefficients via transmittance measurement**

To quantify the absorption properties of ErOCl, we performed optical transmittance measurements using a fiber-coupled experimental setup (Fig. S4a). ErOCl nanosheets were precisely transferred onto the end face of a single-mode fiber optic jumper (core-diameter of 9 μm) using a tapered fiber with a 3D nano-positioning stage, ensuring complete coverage of the fiber core (Fig. S4c). Atomic force microscopy (AFM) characterization confirmed the transferred ErOCl thickness to be 220 nm (Fig. S4c, In multiple tests, the thickness of the selected nanosheets consistently ranged between 180 and 250 nm). Under 1536 nm signal illumination, the material exhibited strong upconversion luminescence, emitting visible green light. Figure 2c shows the test results of a sample with an absorption coefficient of 1934 dB/cm at 1536 nm, corresponding to a calculated absorption cross-section using of 2.6×1020 cm2 (The test results of multiple samples consistently ranged from 1900 to 2200 dB/cm). This high absorption cross-section highlights ErOCl’s potential to achieve high optical gain.

Figure S4 (a) Schematic of absorption measurement setup of ErOCl nanosheets on fiber cross-sections. (b) Microscope images of fiber cross-sections with ErOCl nanosheets. (c) AFM thickness profiling of a transferred ErOCl nanosheet. (d) Absorption coefficient spectrum in the 1.5 μm-band, showing 1934 dB/cm at 1536 nm.

**2.2 Characterization of Absorption and Gain via Differential Reflectance Spectra**

The absorption cross-section of ErOCl at 980 nm is a pivotal parameter for enabling population inversion between the 4I13/2 and4I15/2 energy levels, critical for 1.5 μm optical amplification. A high absorption coefficient at 980 nm enhances pump energy efficiency, thereby reducing the threshold power required for population inversion. To quantitatively assess these absorption characteristics, we transferred ErOCl nanosheets onto a silicon substrate coated with a 100 nm-thick gold (Au) film (Fig. S5) and performed differential reflectance spectroscopy. The experimental setup employed a stabilized tungsten-halogen broadband source (400-2400 nm), with differential reflectance Rc defined as:

(2.1)

where R(0,b,s) and R(0,b,0) represents the reflectance spectra of ErOCl and the Au film (“b” for “broadband probe”, “s” for “sample”), respectively, and Rc reflects the net absorption of ErOCl. Figure 2d in the main text presents the differential reflection spectrum of ErOCl under white light excitation, revealing comparable absorption magnitudes at both pump (980 nm) and emission (1.5 µm) wavelengths. Measurements across three independent samples demonstrated excellent reproducibility, with absorption coefficients at 980 nm consistently within 5% variation.

Figure S5 (a) Schematic of the absorption measurement via differential reflectance spectroscopy; (b) Schematic of the optical gain measurement.

Using the transfer matrix method to calculate and fit the multilayer interference model2, we obtained a differential reflectance spectrum that closely matches experimental data (Fig. S6a). The simulation was performed with an open-source MATLAB code3, incorporating the real part of the refractive index (n=1.73) for ErOCl. From this analysis, we determined the absorption coefficient of ErOCl at 980 nm to be 483 dB/cm (Fig. S6b), corresponding to an absorption cross-section of ~6.28×10-21 cm2, which is 2-3 times higher than that of conventional erbium-doped materials. At 1536 nm, the absorption coefficient was determined to be 1890 dB/cm(Fig. S6d. The test results of multiple samples ranged from 1890 to 2290 dB/cm. This is dependent on the crystalline quality and luminescent properties of the material itself; see Section 2.3), in excellent agreement with the 1900-2200 dB/cm value obtained from fiber-optic transmission experiments. This consistency between independent measurement techniques validates the reliability and accuracy of both the differential reflection experiment and theoretical fitting procedures.

Figure S6 Fitting results of differential reflectance spectra and absorption coefficients: (a)-(b) 980 nm band; (c)-(d) 1480-1590 nm-band; (e) Power-dependent normalized fitted differential reflectance spectra under 980 nm pumping.

To characterize the gain performance of ErOCl at 1.5 μm, we introduced a 980 nm laser as the pump source alongside the white light as the probe source. The differential absorption of ErOCl under 980 nm excitation is defined as:

(2.2)

where R(p,b,s) is the reflection spectrum under simultaneous 980 nm pump and broadband probe illuminating ErOCl (“p” for “pump”), R(p,0,s) represents amplified spontaneous emission (ASE) under 980 nm pumping alone, andR(0,b,0) is the reflection spectrum of the white light probe on the Au substrate. Figure S6e is the power-dependent normalized fitted differential reflectance spectra illustrates the evolution of net differential reflection absorption spectrum of ErOCl with increasing pump power. At low pump powers, the absorption process dominates, as evidenced by negative values in the differential reflection spectrum. As the pump power increases to 31 µW, the absorption transitions to positive values, indicating the onset of population inversion and the emergence of sharp gain peaks. At higher pump power (185 µW), nonlinear up-conversion process occurs and competes with the down-conversion process, leading to a reduction in gain within the 1530 nm band. These power-dependent dynamics demonstrate ErOCl's versatile gain characteristics, spanning from absorption-dominated to saturated regimes, which can be strategically exploited for tunable photonic device applications.

- 1. **Data Processing for Pump-dependent Gain Measurements**

Figure S7 details the comprehensive data processing workflow employed to extract pump-dependent net gain spectra. As depicted in Fig. S7a, reflection spectra measurements generate three essential datasets:

- R(0,b,0): Represents the background condition without pump or sample;
- R(p,0,s): Corresponds to the pumped state with the sample, but no background signal;
- R(p,b,s): Captures the pumped state with both background signal and sample,

Here, “p” and “s” denote the “pump” and “sample” states, respectively, and “b” represents the “background condition”. The net signal component, from which spontaneous emission has been meticulously removed, is calculated as R(p,b,s)−R(p,0,s). It’s important to note that data quality degrades significantly after 1600 nm due to the low detection efficiency of the LN-cooled InGaAs CCD. Figure S7b displays a series of pump power-dependent spectra after further subtracting R(0, b, 0), yielding the expression [R(p,b,s)−R(p,0,s)]-R(0,b,0). This dataset then undergoes iterative smoothing (typically 2 to 3 iterations of 30-point Savitzky–Golay filtering with a second-order polynomial) to effectively reduce noise while preserving the integrity of the signal peak.

To account for system losses, such as those arising from changes in background illumination, or focusing during testing, we normalize the data by dividing it by the background signal light R(0,b,0), thereby obtaining Rc’. This Rc’ value encompasses all such system-induced variations. The power-dependent evolution of Rc’ clearly reveals ErOCl’s characteristic transition from absorption to gain. The spectral region where absorption diminishes and eventually evolves into gain with increasing pump power corresponds to the material’s resonant absorption feature. This allows for precise identification of the absorption position and accurate background subtraction in spectral regions of no absorption, as indicated by the red dashed line in Fig. S7d.

Figure S7 Data Processing for Power-Dependent Gain Measurements: (a) Collected reflectance spectra; (b) Power-dependent *R(p, b, s)−R(p, 0, s)*−*R(0, b, 0)*; (c) Power-dependent [*R(p, b, s)−R(p, 0, s)*−*R(0, b, 0)*]/*R(0, b, 0)*; (d) Schematic of background removal; (e) Power-dependent *Rc*, representing the material’s intrinsic response; (f) Power-dependent variation of *Rc* in the three main emission bands.

After careful background correction, the resulting Rc (Fig. S7e) accurately represents the material’s intrinsic response. Given the relatively weak signal intensity typical of differential reflectance measurements, we carefully evaluated our data processing procedures and the uncertainties introduced by noise. We estimate the resulting errors in the extracted peak gain and absorption values to be within 15%. Finally, Fig. S7f summarizes the pump-dependent variation of Rc across the three primary emission bands. Notably, the 1560 nm band exhibits an earlier onset of gain compared to shorter wavelengths, while the 1500 nm band demonstrates a comparatively higher gain threshold. These observations highlight distinct population dynamics and transition efficiencies within the ErOCl system.

- 1. **Comparative Gain Analysis on Various ErOCl Samples**

To validate the reproducibility of gain measurements, we conducted a comparative analysis of two ErOCl samples with distinct thicknesses using photoluminescence (PL) spectroscopy and differential reflectance spectroscopy. Optical images of the samples (Fig. S7a, c) highlight transparent, uniform regions (circled in red) selected for gain characterization, while AFM results (Fig. S7b, d) confirm their respective thicknesses. PL spectroscopy reveals that sample 2 exhibits a higher PL intensity per unit thickness compared to sample 1 (Fig. S9e). This enhanced intensity is likely attributed to the superior crystalline quality, which facilitates more efficient optical activity of the erbium ions. Consistent with this, differential reflectance spectroscopy shows that sample 2 exhibits a higher net absorption coefficient than sample 1 (Fig. S9f).

Figure S8 (a)-(b) Optical micrographs and thickness profiles of samples 1; (c)-(d) Optical micrographs and thickness profiles of samples 2; (e) Normalized PL intensity per unit thickness under identical pump power. (f) Fitting of the absorption coefficients; (g) Fitted optical gain evolution.

The current gain characterization method presents two technical limitations requiring explicit acknowledgement. First, the signal-to-noise ratio of differential reflectance spectra from limited-thickness ErOCl samples remains compromised, primarily due to constrained light-matter interaction cross-sections in ultrathin material systems. Second, the data processing protocol employing spectral smoothing and manual background subtraction introduces systematic uncertainties. Reproducibility challenges manifest as ±200 dB/cm gain variations across repeated measurements, primarily arising from interlayer stress inhomogeneity and micron-scale excitation positioning inaccuracies. Nevertheless, power-dependent gain spectra analysis near 1536 nm (Fig. S9g) demonstrates saturation gain coefficients of 1700-2200 dB/cm for sample 1 and sample 2, respectively. These results represent a remarkable twenty-fold improvement over the highest reported values for erbium compounds4, underscores ErOCl's potential as a next-generation gain medium for photonic applications.

Table 1. Summary of gain coefficients for optical materials

| Material | Gain band | Gain Value (Unit) | Method |
| --- | --- | --- | --- |
| Bulk GaN5 | 360 nm | ~105 cm-1 | Transmission |
| Colloidal CdSe nanoplatelets6 | 480-580 nm | ~15300 cm-1 | VSL |
| Bulk CdS nanocrystal7 | 465-550 nm | 50000 cm-1 | VSL |
| CsPbBr38 | ~540 nm | ~100 cm-1 | VSL |
| InP/AlGaInP quantum dots9 | 660 nm | 2675cm-1 | Transmission |
| WSe210 | 760 nm | ~7000 cm-1 | / |
| GaAsBi/GaAs quantum well11 | 1000 nm | 1500 cm−1 | Transmission |
| Colloidal HgTe quantum dots12 | ~1200 nm | 100-500 cm-1 | VSL |
| ECS nanowires4 | 1532 nm | >23 cm-1 | Transmission |
| ErOCl nanosheets (This work) | **1500-1565 nm** | **~500 cm-1** | **DRS** |

**2.5 Crystal-Field Simplification Drives High Optical Gain in ErOCl**

The enhanced absorption cross-section and record-high net gain in ErOCl arise from multiple synergistic factors. First, ErOCl exhibits significantly reduced energy level splitting compared to ECS, as evidenced by its simpler low-temperature PL spectrum (Fig. S8). At 8K, ErOCl’s emission is characterized by discrete bands with narrow linewidths, corresponding to well-defined energy states. The simplified spectral structure suggests that Er3+ ions in ErOCl experience a less complex crystal field potential, which promotes dominant transitions between specific energy levels associated with the primary emission peak. Such a nearly intrinsic sub-level configuration facilitates efficient radiative transitions, significantly enhancing the emission efficiency of Er ions and increasing both the absorption and emission cross-sections. Additionally, the exceptionally high room-temperature gain coefficient can be attributed to ErOCl's unique temperature-dependent PL behavior, which exhibits a positive temperature dependence up to 300 K (discussed in detail in the subsequent section). This negative thermal-quenching phenomenon, likely driven by reduced non-radiative recombination at elevated temperatures, amplifies optical gain under ambient conditions.

Figure S9 PL emission spectra of ErOCl and ECS at 8K.

**2.6 Anomalous Temperature-dependent PL Quenching in ~1.5 µm Band**

We investigate the temperature-dependent PL properties of ErOCl using a micro-PL system, spanning a temperature range from 8 K to 280 K under 980 nm excitation at a fixed pump power. As shown in Fig. S9a, the 1.5 µm emission band exhibited a significant intensity enhancement with increasing temperature. Quantitative analysis of the integrated intensity across four emission bands revealed a distinct temperature dependence (Fig. S9b), which followed an exponential growth trend in logarithmic coordinates. This behavior starkly contrasts with conventional semiconductors, where non-radiative recombination rate typically increases and PL intensity quenches at elevated temperatures. In ErOCl, the 1.5 µm band emission intensity increases by over one order as the temperature rises from 8 K to 280 K, suggesting a thermally activated radiative process. This anomalous temperature dependence likely stems from suppressed non-radiative decay channels and enhanced population redistribution among Er³⁺ energy levels at higher temperatures. Such unique properties not only distinguish ErOCl from traditional gain materials but also provide a plausible explanation for its exceptional room-temperature net gain.

Figure S10 (a) Temperature-dependent PL spectra (1480-1610 nm) from 8 K to 280 K. (b) Power- dependent integrated intensity of different near-infrared bands. (c) Temperature-dependent upconversion emission (650-680 nm) from 8 K to 296 K. (d) Power-dependent integrated intensity of the upconversion emission. All the spectra were collected under 980 nm pumping.

Temperature-dependent upconversion measurements of ErOCl under 980 nm excitation were conducted using a spectrometer equipped with LN-cooled Silicon detector. The upconversion emission in the visible band is dominated by red light (650-680 nm), as shown in Fig. S9c. The emission intensity exhibits a slight decrease in intensity from 8K to 40 K, accompanied by the emergence of new sub-peaks corresponding to transitions between thermally populated energy levels. Despite these spectral changes, the total integrated intensity in this band remains constant across the temperature range of 100 to 300 K (Fig. S9d). This invariance confirms that the observed temperature-dependent enhancement in the 1.5 µm band (Fig. S9b) is not caused by a reduction in upconversion processes, but rather reflects intrinsic material properties such as suppressed non-radiative decay and efficient energy redistribution among Er³⁺ states.

**Section 3. Design and Fabrication of Photonic Crystal Microcavities**

**3.1 Optimization of Simulation Parameters and Q-factor Sensitivity Analysis**

Finite-difference time-domain (FDTD) simulations were performed to optimize the photonic crystal lattice parameters to achieve a high-quality factor (Q-factor). The first-order mode of the microcavity was identified at 1530 nm, with a theoretical Q-factor exceeding 104 (Fig. S10a, b). The lateral mode distribution of the L3 cavity, shown in Fig. S10c, demonstrates strong field confinement within the photonic crystal structure. Fabricated using standard microfabrication techniques, the silicon microcavities exhibit an estimated mode volume of ~ 0.2 μm3 (1.8(λ/n)3). Critical coupling analysis revealed that the Q-factor remains highly sensitive to ErOCl layer thickness. For layer thickness (n=1.7) between 30-60 nm, the Q-factor maintains >80 % of its maximum value (Fig. S10d).

Figure S11 (a) Mode wavelength position of the L3 microcavity; (b) Corresponding quality factor (Q); (c) Electric field distribution within the microcavity; (d) Dependence of the cavity mode wavelength and Q-value on the thickness of the transferred material.

**3.2 Fabrication Process of the Laser Device**

The silicon microcavities were fabricated using standard microfabrication techniques (Fig. S11a), with electron beam lithography (EBL) performed at a beam current of ~ 200 pA to ensure precise patterning. Scanning electron microscopy (SEM) images of the photonic crystal structure (Fig. S11b, c) confirm an estimated mode volume of ~ 0.15 μm3 (1.6(λ/n)3, where n=3.4 for silicon). The laser device fabrication process is illustrated in Fig. S11d, e. Initially, ErOCl nanosheet (Fig. S11f) was mechanically exfoliated from the growth substrate using a polydimethylsiloxane (PDMS) stamp. Through iterative exfoliation and transfer steps, a thin ErOCl layer was precisely positioned at the cavity mode region of the photonic crystal. Figures S11f shows the exfoliated material adhered to the PDMS stamp, while Fig. S11g presents the completed laser device, demonstrating successful integration of ErOCl with the photonic crystal cavity.

Figure S12 (a) Fabrication process of photonic crystal cavity; (b)SEM image of the fabricated L3 cavity (c) Zoomed-in view of the mode position; (d)-(e) Schematic of the laser device preparation procedure; (f)-(g) Optical images of the thin-layer ErOCl and the fabricated laser device, with the transferred ErOCl layer highlighted by the blue dashed line.

**Section 4. Linewidth Analysis of Lasing Modes**

To rigorously characterize the spectral properties of the device in Fig. 3d of the main text, we employed a Lorentzian fitting procedure to analyze the emission peaks. The Lorentzian function is expressed as:

(4.1)

Where *I*0 is the peak intensity, ​*λ*0 is the central wavelength, and the full width at half maximum (FWHM) is given by 2*α*. At lower pump powers, the fitting accuracy is limited by the low signal-to-noise ratio (SNR) of the measured spectra. As the pump power increases, additional spontaneous emission peaks emerge, which are distinct from the cavity mode peak. To ensure precise extraction of the mode linewidth, these spontaneous contributions should be systematically subtracted. As shown in Fig. S12a, we modeled the spectra by incorporating two spontaneous emission components (Peak spon1 and spon2) alongside the Lorentzian mode peak. This approach is essential for accurately resolving the subtle linewidth narrowing associated with lasing threshold behavior.

Figure S13 Multi peak fitting method for subtracting background peaks and determining pattern linewidth (a) Fine FWHM fitting of the lasing mode at pump power from 0.8 μW to 7 μW.

The detailed fitting results for pump powers ranging from 0.8 μW to 7 μW are presented in Fig. S3. The multi-peak fitting curve (purple) shows excellent agreement with the experimental data (black). For pump power above 3 μW, the average relative error between the fitted and experimental values is less than 5%, validating the accuracy and robustness of the fitting procedure.

Figure S14 Fine FWHM fitting of the lasing mode at pump power from 0.8 μW to 7 μW.

**Section 5. Spatial Light Distribution Imaging: Below- and Above-Threshold**

The spatial characteristics of the emission were analyzed using a 2D InGaAs detector. As shown in Fig. S14, distinct interference fringes are observed at the mode emission position when the pump power exceeds the lasing threshold, a signature of coherent light emission. In contrast, below-threshold emission exhibits no such interference patterns, consistent with incoherent spontaneous emission. These observations provide clear spatial evidence of the transition from spontaneous emission to coherent lasing as the pump power surpasses the threshold.

Figure S15 Spot imaging of the mode position below (upper) and above (bottom) threshold.

**Section 6. Lifetime Dynamics of Spontaneous Emission vs. Lasing Emission**

**6.1 Wavelength-dependent Spontaneous Emission Lifetime at Room-temperature**

The spontaneous emission lifetimes of ErOCl at room temperature were characterized through time-resolved photoluminescence spectroscopy using a high-resolution grating spectrometer coupled with an InGaAs single photon detector (timing jitter < 200 ps). As shown in Fig. S15a, four primary emission wavelengths were selected for analysis, revealing room temperature lifetimes ranging from 1.2 ms (1536 nm) to 1.6 ms (1556 nm). the radiative lifetimes exhibited an inverse correlation with the emission intensity. Stronger spectral peaks corresponded to shorter lifetimes, consistent with enhanced radiative recombination efficiency. This long spontaneous lifetime is attributed to the simplified lattice potential field in ErOCl, as discussed in section 2.3, which reduces the channels for non-radiative relaxation of excited state ions. Also, the extended lifetime directly reflects the suppression of non-radiative processes, highlighting the exceptional crystalline quality of ErOCl.

Figure S16 (a) Wavelength-dependent spontaneous emission lifetimes at room temperature; (b) Comparison of spontaneous emission lifetime (orange) and mode emission lifetime under high pump power (> 50Pth) (purple).

**6.2 Lifetime Comparison: Spontaneous Emission vs. Lasing Mode**

In integrated microcavity devices, under 980 nm pumping above the lasing threshold, the laser mode lifetime is further reduced to ~ 47 μs, representing one order decrease compared to the spontaneous emission lifetime. This dramatic reduction highligths a substantial enhancement in the stimulated emission rate and cavity-mediated energy transfer dynamics, as consistently demonstrated in two independently fabricated laser devices. Due to the use of a thin ErOCl layer as the active gain medium, the absolute PL intensity remains relatively low. To precisely resolve the lifetime of the mode peak, we employed a superconducting nanowire single-photon detector (SNSPD) with a quantum efficiency exceeding 80% at 1.5 μm, enabling high-sensitivity characterization of the emission dynamics.

**Section 7. Four-level Rate Equation Modeling for Er3+ Ion Population Dynamics**

Figure S17 Simplified four-level transition system of erbium ions.

The energy level dynamics of the ErOCl device were rigorously analyzed through a simplified four-level rate-equation model (Fig. S16). Here, R13 denotes the 980 nm pump-induced transition rate, Aij corresponds to spontaneous emission processes, and Cij accounts for high-order nonlinear interactions, such as energy transfer upconversion or cross-relaxation. This formulation captures the interplay between population inversion and stimulated emission, providing a foundation for analyzing the system's gain dynamics. The rate equation of the four-level laser system is:

(6.1)

(6.2)

(6.3)

(6.4)

(6.5) (6.6)

(6.7)

(6.8)

(6.9)

where, S represents the photon number. vg is the group velocity. Pin represents the pump power. Θ denotes the size of the light spot. τij is the spontaneous emission lifetime. η is the efficiency coefficient. *hν* represents the energy of each photon. Γ is the optical confinement factor. *Fp* is the Purcell factor:

(6.10)

As described in Section 2.3, we assume an effective mode volume Veff = 1.6 (λ/n)3 and a quality factor Q=4500, yielding a Purcell factor *Fp*=210. The spontaneous emission factor β, defined as the ratio of spontaneous emission coupled into the lasing mode to the total spontaneous emission, is expressed as:

(6.11)

The gain coefficient g is determined by the population inversion between the upper (*N*2) and lower (*N*1) energy levels, given by g=σ12(*N*2-*N*1), where σ12 is the transition cross-section.

Table 2. Parameters of ErOCl-based laser device

| Parameter | Definition | Value/Unit |
| --- | --- | --- |
| N | Carrier density | cm-3 |
| NEr | Total number of erbium ions | 1.75×1022 cm-3 |
| Pin | Pump power | μW |
| η | Absorption efficiency |  |
| Θ | Spot size | ~ 5 μm2 |
| τ21 | Spontaneous emission lifetime | 7×10-4 -1.5×10-3 s |
| τ31 | 1×10-4 s |
| τ32 | 1×10-4 s |
| τ43 | 1×10-1 s |
| τ41 | 2×10-1 s |
| τsp | Photon lifetime | ~ 5×10-5 s |
| C2 | Nonlinear process coefficient | (0.1-10)×10-18 cm3/s |
| C3 | (0.1-10)×10-17 cm3/s |
| C14 | (0.1-10)×10-15 cm3/s |
| σ13 | Absorption cross-section | 6.5-9×10-21 cm2 |
| σ12 | 0.1-3×10-20 cm2 |
| β0 | Spontaneous emission factor without Purcell enhancement | ~ 0.6 |
| Γ | Confinement factor | ~ 0.0002-0.001 |

Figure S17a depicts the evolution of the photon number S and the population densities N2 and N1 as a function of pump intensity. Figure S17b presents the fitting results for the laser device with a confinement factor of 0.0002. The analysis reveals a spontaneous emission coupling factor *β*0=0.6, corresponding to a *β* value of approximately 0.995, indicating highly efficient coupling of spontaneous emission into the lasing mode.

Figure S18 (a) Evolution of population densities at different energy levels and photon numbers as a function of pump densities; (b) Fitting results of a laser device with various β value.

**Section 8. Performance Benchmarking and Operational Stability Assessment**

**8.1 Comparative Performance Analysis**

In Fig. 3f of the main text, we present a comparative analysis of the lasing thresholds achieved by our device relative to state-of-the-art silicon-based nanolasers. To further facilitate direct comparison, we provide a detailed table summarizing the key performance metrics of these devices, including gain materials, cavity designs, pump conditions, operation wavelengths, and lasing thresholds. This table highlights the superior performance of our device, underscoring its potential as a leading candidate for next-generation silicon photonics applications.

Table 3. Summary of state-of-the-art silicon-based lasers

| **Gain materials** | **Cavity Designs** | **Operation Wavelengths** | **Pump Conditions** | **Lasing Thresholds** | **Operation Temperature** |
| --- | --- | --- | --- | --- | --- |
| InAs/GaAs QDs 13 | Photonic crystal | 1280-1360 nm | CW | ~0.6 μW | RT |
| InGaAs/InP 14 | DFB | 1354 nm | CW | 7.8 mW | RT |
| TMDC 15 | Photonic crystal | 1305 nm | CW | 1.5 kW/cm2 (35 μW) | RT |
| GaAs QDs16 | BIC | 1275 nm | CW | 80 W/cm2 | RT |
| InGaAsP 17 | silver-cup SPP mode | 1500-1550 nm | Pulsed | 20.1 kW/cm2 | RT |
| Strained Ge nanowires 18 | DBR | 1500-1600 nm | CW | 3 kW/cm2 | 83 K |
| Er-doped LNOI 19 | Microring | 1520-1580 nm | CW | 3.5 mW | RT |
| Er-doped Si3N4 20 | Intracavity microring-based Vernier filter | 1550-1585 nm | CW | ~20 mW | RT |
| **This work** | **Photonic crystal** | **1561 nm** | **CW** | **7 μW** | **RT** |

**8.2 Laser Device Stability**

As shown in Fig. S19a, the device exhibited remarkable environmental stability, with no significant degradation in emission intensity observed after 80 days of air exposure. Over this period, the mode wavelength shifted by 1.4 nm, while the emission linewidth increased by approximately 9%, from 0.35 nm to 0.38 nm, primarily due to the gradual influence of ambient water and oxygen. These results underscore the robustness of the device for practical applications in ambient conditions.

Figure S19 (a) Spectral comparison of devices after 80 days of air exposure. (b) Spectra of multiple well coupled devices, covering a range from 1500-1600 nm.

The ErOCl material, synthesized at 900 ℃, exhibited excellent crystalline quality and thermal stability, which was further reflected in the robust performance of the fabricated devices. As shown in Fig. S19b, the spectral characteristics of a device with a mode position at 1511 nm were measured under elevated temperatures. When the temperature increased from 25 ℃ to 70 ℃, the device exhibited a mode wavelength redshift of 2 nm, accompanied by a linewidth broadening of only 0.06 nm due to thermal effects. These findings underscore the high thermal robustness of the ErOCl material and its devices, showcasing their potential for practical applications.

**References**

1 Xie, C., Yang, P., Huan, Y., Cui, F. & Zhang, Y. Roles of salts in the chemical vapor deposition synthesis of two-dimensional transition metal chalcogenides. *Dalton Transactions* **49**, 10319-10327, doi:10.1039/d0dt01561j (2020).

2 Wang, Z. *et al.* Excitonic complexes and optical gain in two-dimensional molybdenum ditelluride well below the Mott transition. *Light Sci Appl* **9**, 39, doi:10.1038/s41377-020-0278-z (2020).

3 Burkhard, G. F., Hoke, E. T. & McGehee, M. D. Accounting for Interference, Scattering, and Electrode Absorption to Make Accurate Internal Quantum Efficiency Measurements in Organic and Other Thin Solar Cells. *Adv. Mater.* **22**, 3293-3297, doi:10.1002/adma.201000883 (2010).

4 Sun, H. *et al.* Giant optical gain in a single-crystal erbium chloride silicate nanowire. *Nature Photonics* **11**, 589-593, doi:10.1038/nphoton.2017.115 (2017).

5 Dingle, R., Shaklee, K. L., Leheny, R. F. & Zetterstrom, R. B. Stimulated Emission and Laser Action in Gallium Nitride. *Applied Physics Letters* **19**, 5-7, doi:10.1063/1.1653730 (1971).

6 Guzelturk, B., Pelton, M., Olutas, M. & Demir, H. V. Giant Modal Gain Coefficients in Colloidal II-VI Nanoplatelets. *Nano Lett* **19**, 277-282, doi:10.1021/acs.nanolett.8b03891 (2019).

7 Tanghe, I. *et al.* Optical gain and lasing from bulk cadmium sulfide nanocrystals through bandgap renormalization. *Nat Nanotechnol*, doi:10.1038/s41565-023-01521-0 (2023).

8 Kim, I. *et al.* Gain enhancement of perovskite nanosheets by a patterned waveguide: excitation and temperature dependence of gain saturation. *Light Sci Appl* **12**, 285, doi:10.1038/s41377-023-01313-0 (2023).

9 Huang, Z., Zimmer, M., Hepp, S., Jetter, M. & Michler, P. Optical Gain and Lasing Properties of InP/AlGaInP Quantum-Dot Laser Diode Emitting at 660 nm. *IEEE Journal of Quantum Electronics* **55**, 1-7, doi:10.1109/jqe.2019.2896643 (2019).

10 Chen, Z. Z. *et al.* Electrically‐Driven 2D Semiconductor Microcavity Laser. *Adv. Mater.*, doi:10.1002/adma.202509861 (2025).

11 Marko, I. P. *et al.* Optical gain in GaAsBi/GaAs quantum well diode lasers. *Sci Rep* **6**, 28863, doi:10.1038/srep28863 (2016).

12 Geiregat, P. *et al.* Continuous-wave infrared optical gain and amplified spontaneous emission at ultralow threshold by colloidal HgTe quantum dots. *Nat Mater* **17**, 35-42, doi:10.1038/nmat5000 (2018).

13 Zhou, T. *et al.* Continuous-wave quantum dot photonic crystal lasers grown on on-axis Si (001). *Nat Commun* **11**, 977, doi:10.1038/s41467-020-14736-9 (2020).

14 Tian, B. *et al.* Room Temperature O-band DFB Laser Array Directly Grown on (001) Silicon. *Nano Letters* **17**, 559-564, doi:10.1021/acs.nanolett.6b04690 (2016).

15 Fang, H. *et al.* 1305 nm Few-Layer MoTe2-on-Silicon Laser-Like Emission. *Laser & Photonics Reviews* **12**, doi:10.1002/lpor.201800015 (2018).

16 Ren, Y. *et al.* Low-threshold nanolasers based on miniaturized bound states in the continuum. **8**, eade8817, doi:doi:10.1126/sciadv.ade8817 (2022).

17 Xu, J. *et al.* Room‐Temperature Low‐Threshold Plasmonic Nanolaser through Mode‐Tailoring at Communication Wavelengths. *Laser & Photonics Reviews* **17**, doi:10.1002/lpor.202200322 (2022).

18 Bao, S. *et al.* Low-threshold optically pumped lasing in highly strained germanium nanowires. *Nature Communications* **8**, doi:10.1038/s41467-017-02026-w (2017).

19 Yin, D. *et al.* Electro-optically tunable microring laser monolithically integrated on lithium niobate on insulator. *Opt Lett* **46**, 2127-2130, doi:10.1364/OL.424996 (2021).

20 Liu, Y. *et al.* A fully hybrid integrated erbium-based laser. *Nature Photonics*, doi:10.1038/s41566-024-01454-7 (2024).
